# Supplementary material
Source: PubMed Central journal article supplement (PMC3410643)

Emission spectrum obtained exciting at 360 nm different HOSi-NP (A) and MMASi-NP (B) batches. The different colors indicate different synthesis dates.

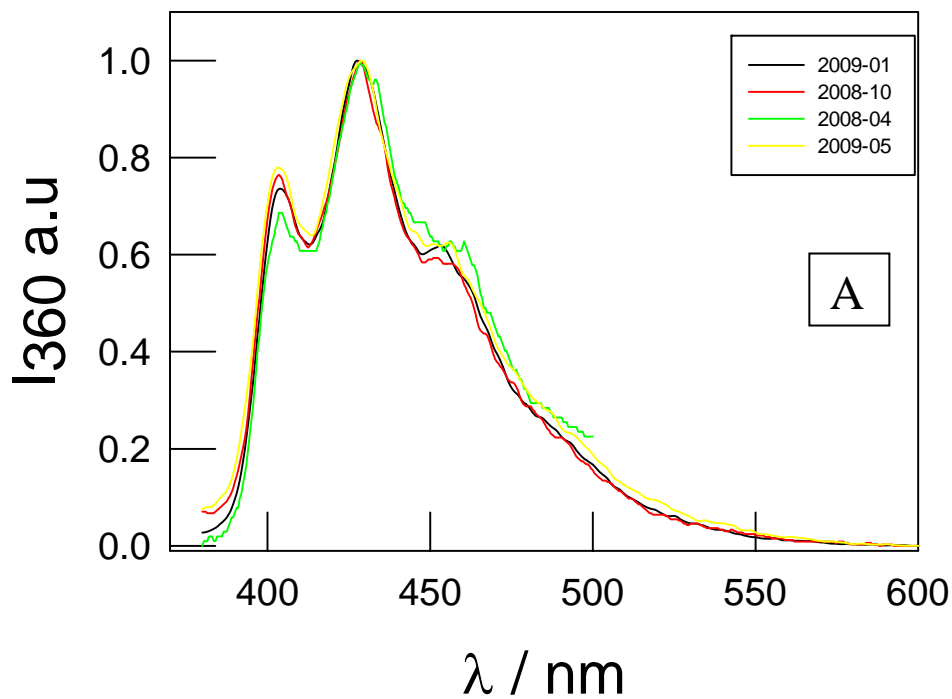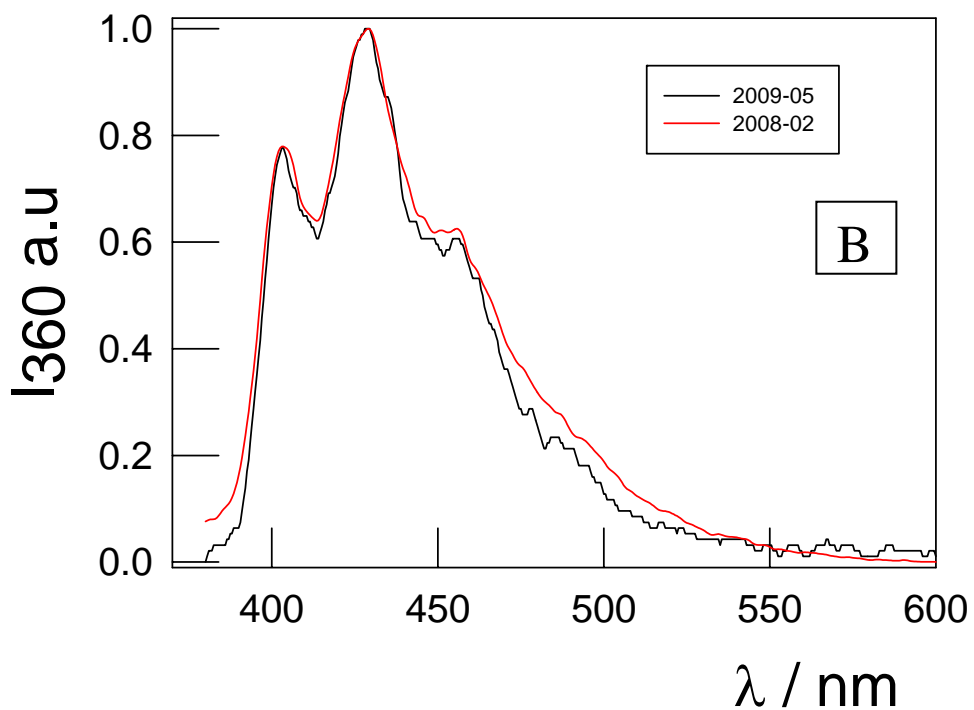

Supplement: NIHMS192674-supplement-Supporting_information.pdf [file NIHMS192674-supplement-Supporting_information.pdf]
